# Supplementary material for: The Human Mercaptopyruvate Sulfurtransferase TUM1 Is Involved in Moco Biosynthesis, Cytosolic tRNA Thiolation and Cellular Bioenergetics in Human Embryonic Kidney Cells
Source: MDPI journal article supplement (doi:10.3390/biom13010144), 2023-01-10
Supplement: s1 [file s1]

## Supplementary data

### Results

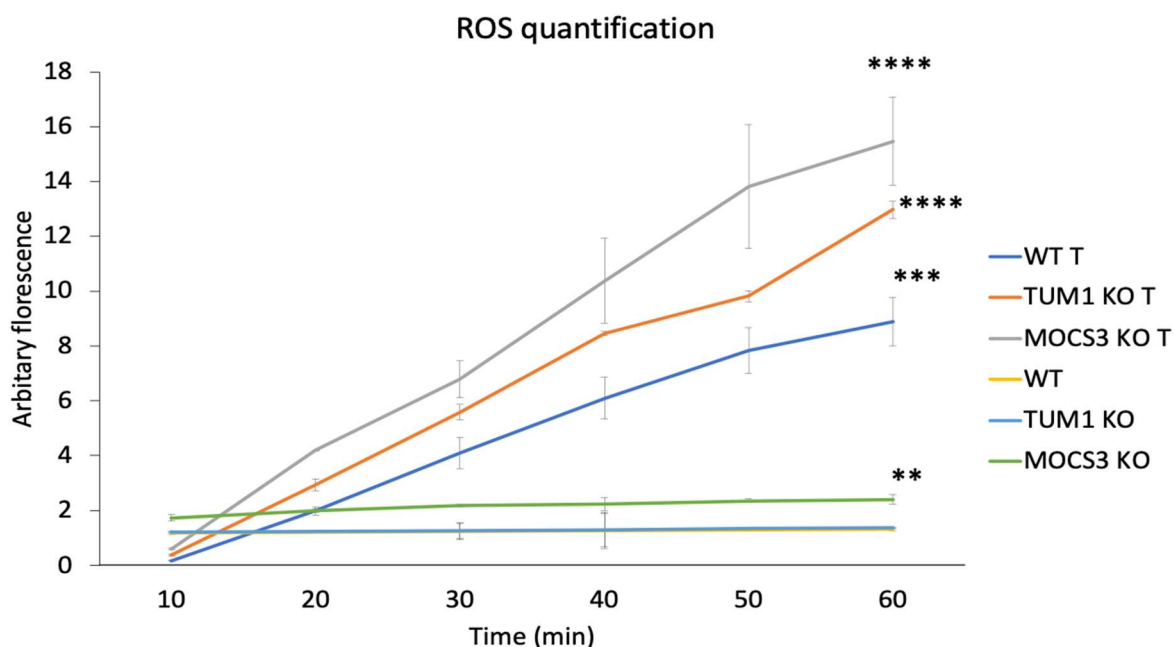

**Figure S1.** Quantification of reactive oxygen species in HEK293T. After 1 h 50  $\mu\text{M}$   $\text{H}_2\text{O}_2$  treatment ROS generated in WT and *TUM1* KO were quantified using the carboxy-DCFHDA. Mean change in fluorescence was plotted for WT, *TUM1* KO and *MOCS3* KO. T represents cell lines treated with 50  $\mu\text{M}$   $\text{H}_2\text{O}_2$ . ( $n = 4$ ;  $n$  represents number of biological replicates). ( $n = 4$ ). Independent samples t-test with SPSS was performed as indicated ND; no statistical difference, \*;  $p < 0.05$ , \*\*;  $p < 0.01$ , \*\*\*;  $p < 0.005$ ; \*\*\*\*;  $p < 0.001$ .

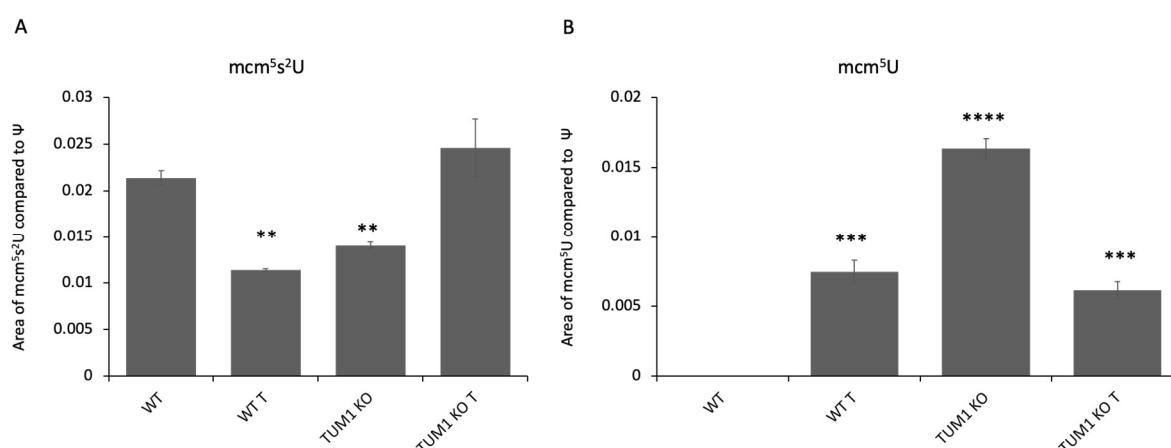

**Figure S2.** Effect of oxidative stress on tRNA thiolation. Cells were treated with 50  $\mu\text{M}$   $\text{H}_2\text{O}_2$  and total RNAs were extracted using phenol-isopropanol precipitation. tRNAs were separated after-ward from total RNA using Urea gel. T represents cell lines treated with 50  $\mu\text{M}$   $\text{H}_2\text{O}_2$ . Respective tRNA were digested and corresponding nucleosides were analyzed on the HPLC for (A) mcm<sup>5</sup>s<sup>2</sup>U (B) mcm<sup>5</sup>U ( $n = 3$ ). Independent samples t-test with SPSS was performed as indicated ND; no statistical difference, \*;  $p < 0.05$ , \*\*;  $p < 0.01$ , \*\*\*;  $p < 0.005$ , \*\*\*\*;  $p < 0.001$ .

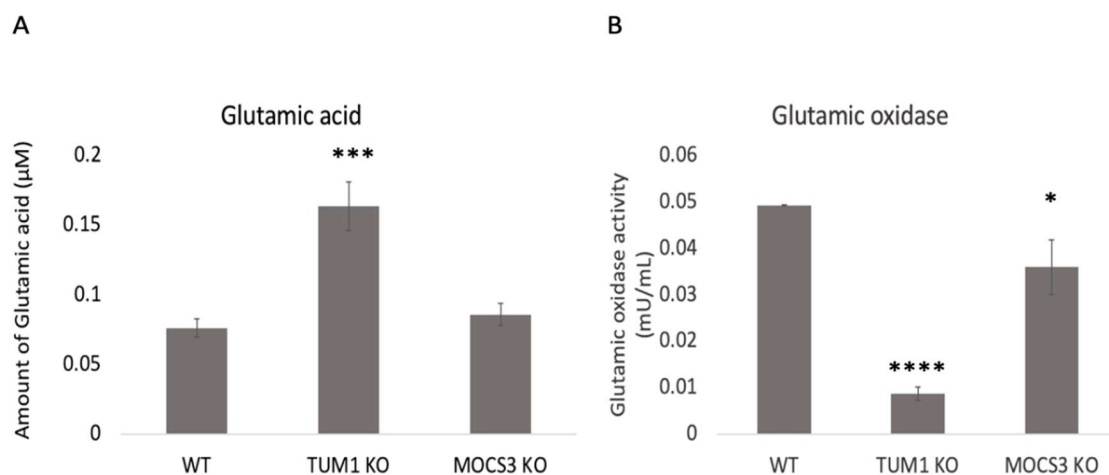

**Figure S3.** Quantification of glutamic acid and glutamic oxidase activity in HEK 293T. Briefly 60  $\mu$ g of cell lysate was diluted in reaction buffer and mixed with 1:1 Amplex red reagent. The excitation and emission was measured for 1 hour at 571 and 585 nm respectively (A) amount of glutamate (B) glutamic oxidase activity. ( $n = 3$ ). Independent samples t-test with SPSS was performed as indicated ND; no statistical difference, \*,  $p < 0.05$ , \*\*,  $p < 0.01$ , \*\*\*,  $p < 0.005$ , \*\*\*\*,  $p < 0.001$ .
